# Supplementary material for: Visible-light-driven photocatalytic water oxidation over LaNbON2–LaMg2/3Nb1/3O3solid solutions
Source: Royal Society of Chemistry journal article supplement (doi:10.1039/d1qi00166c), 2021-01-01
Supplement: d1qi00166c1.pdf [file d1qi00166c1.pdf]

## Supporting Information

### Visible-light-driven photocatalytic water oxidation over $\text{LaNbON}_2\text{-LaMg}_{2/3}\text{Nb}_{1/3}\text{O}_3$ solid solutions

Ran Wang,<sup>‡a</sup> Qi Wang,<sup>‡b</sup> Jun Qian<sup>\*b</sup> and Xiaoxiang Xu<sup>\*a</sup>

*<sup>a</sup>Clinical and Central Lab, Putuo People's Hospital, Shanghai Key Lab of Chemical Assessment and Sustainability, School of Chemical Science and Engineering, Tongji University, Shanghai, 200060, China*

*<sup>b</sup>Department of Neurosurgery, Tongji Hospital, Tongji University School of Medicine, Tongji University, 389 Xincun Road, Shanghai, 200065, China*

\*Corresponding authors

Xiaoxiang Xu (Email: [xxxu@tongji.edu.cn](mailto:xxxu@tongji.edu.cn); Tel: +86-021-65986919)

Jun Qian ([qianjun19@126.com](mailto:qianjun19@126.com); Tel: +86-21-66111653)

<sup>‡</sup>These authors contribute equally.

Supporting information content

Number of pages: 5 (S1-S5)

Number of figures: 3 (Figure S1 to S3)

Number of tables: 1 (Table S1)

## Content

### Figures:

**Figure S1.** SEM-EDX mapping of particles of sample  $(\text{LaNbON}_2)_{0.8}(\text{LaMg}_{2/3}\text{Nb}_{1/3}\text{O}_3)_{0.2}$  ( $x = 0.2$ ).

**Figure S2.** Thermogravimetric analysis (TGA) curves of  $(\text{LaNbON}_2)_{1-x}(\text{LaMg}_{2/3}\text{Nb}_{1/3}\text{O}_3)_x$  ( $0.0 \leq x \leq 1.0$ ) powders in air with heating rate of 10 K/min from 25 °C to 1300 °C

**Figure S3.** PL spectra of  $\text{LaNbON}_2$ ,  $(\text{LaNbON}_2)_{0.8}(\text{LaMg}_{2/3}\text{Nb}_{1/3}\text{O}_3)_{0.2}$  ( $x = 0.2$ ),  $\text{LaMg}_{2/3}\text{Nb}_{1/3}\text{O}_3$ .

### Table:

**Table S1.** Band gap and N content from TGA of sample powders

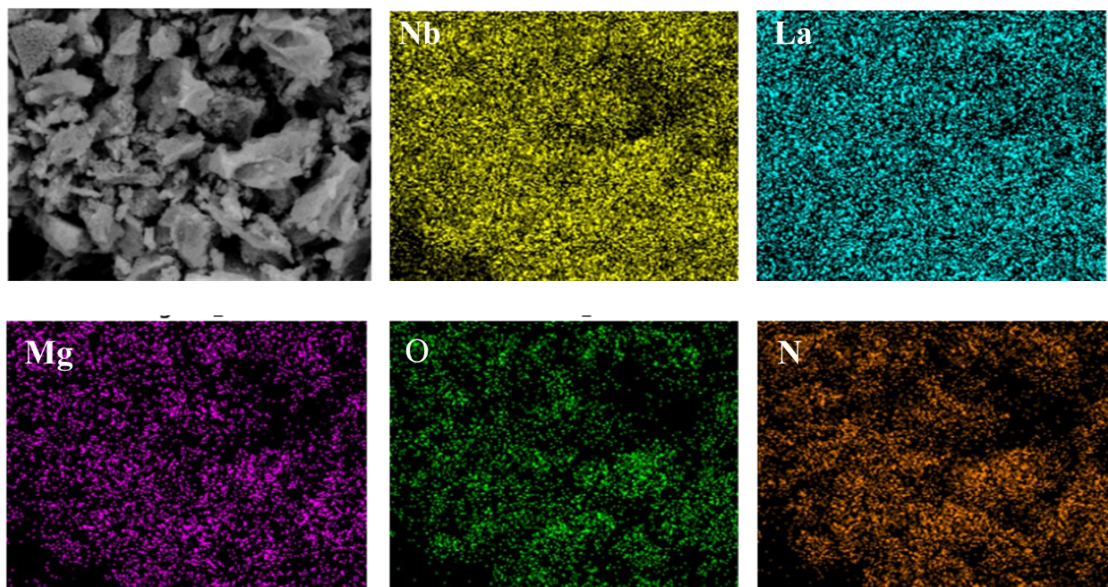

Figure S1. SEM-EDX mapping of particles of sample  $(\text{LaNbON}_2)_{0.8}$   $(\text{LaMg}_{2/3}\text{Nb}_{1/3}\text{O}_3)_{0.2}$  ( $x = 0.2$ ).

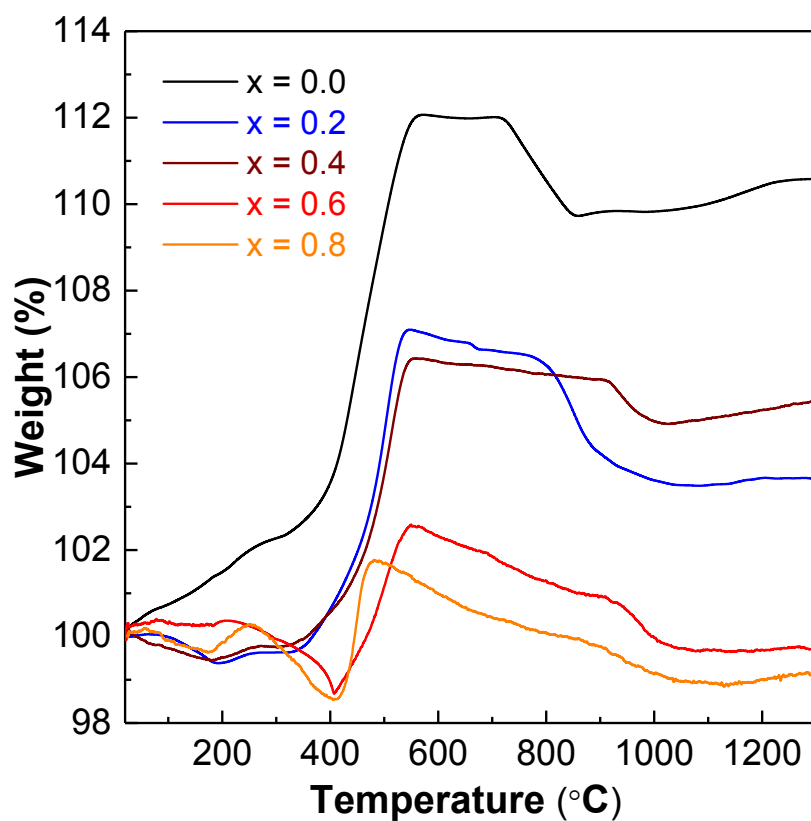

Figure S2. Thermogravimetric analysis (TGA) curves of  $(\text{LaNbON}_2)_{1-x}$   $(\text{LaMg}_{2/3}\text{Nb}_{1/3}\text{O}_3)_x$  ( $0.0 \leq x \leq 1.0$ ) powders in air with heating rate of 10 K/min from 25 °C to 1300 °C

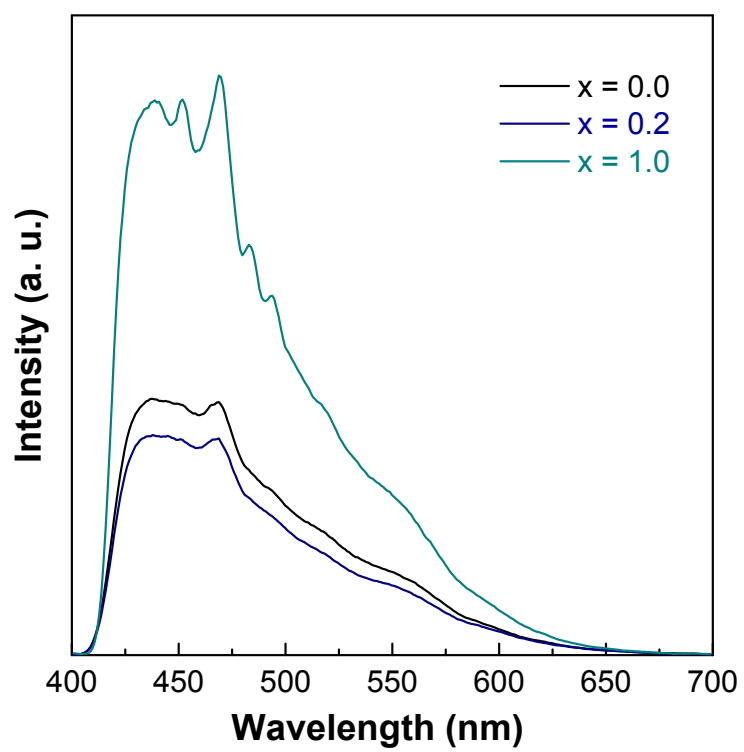

Figure S3. PL spectra of  $\text{LaNbON}_2$ ,  $(\text{LaNbON}_2)_{0.8}(\text{LaMg}_{2/3}\text{Nb}_{1/3}\text{O}_3)_{0.2}$  ( $x = 0.2$ ),  $\text{LaMg}_{2/3}\text{Nb}_{1/3}\text{O}_3$ .

Table S1. Band gap and N content from TGA of sample powders

| x   | Band gap (eV) | N content from TGA (%) |
|-----|---------------|------------------------|
| 0.0 | 1.50          | 9.28%                  |
| 0.2 | 1.51          | 8.23%                  |
| 0.4 | 1.93          | 6.14%                  |
| 0.6 | 2.14          | 3.12%                  |
| 0.8 | 2.23          | 1.43%                  |
| 1.0 | 4.11          | —                      |
